# Supplementary material for: Association Between Antenatal Exposure to Zika Virus and Anatomical and Neurodevelopmental Abnormalities in Children
Source: PubMed Central journal article supplement (PMC7341180; doi:10.1001/jamanetworkopen.2020.9303), 2020-07-07
Supplement: jamanetwopen-3-e209303-s001.pdf [file jamanetwopen-3-e209303-s001.pdf]

## Supplementary Online Content

Cranston JS, Tiene SF, Nielsen-Saines K, et al. Association between antenatal exposure to Zika virus and anatomical and neurodevelopmental abnormalities in children. *JAMA Netw Open*. 2020;3(7): e209303.  
doi:10.1001/jamanetworkopen.2020.9303

**eTable 1.** Cardiologic Abnormalities Identified

**eTable 2.** Abnormal Transfontanellar Ultrasonography Findings

**eTable 3.** Abnormal CT or MRI Findings

This supplementary material has been provided by the authors to give readers additional information about their work.

**eTable 1.** Cardiologic Abnormalities Identified

|                             |
|-----------------------------|
| Patent foramen ovale        |
| Bicuspid aortic valve       |
| Hypertrophic cardiomyopathy |
| Mitral Regurgitation        |
| Tricuspid Insufficiency     |
| Aortic Coarctation          |
| Pulmonary Stenosis          |
| Atrial Septal Defect        |
| Ventricular Septal Defect   |

**eTable 2. Abnormal Transfontanellar  
Ultrasonography Findings**

|                      |
|----------------------|
| Microcephaly         |
| Hydrocephaly         |
| Cerebral Abnormality |
| Calcification        |
| Other Abnormality    |

**eTable 3.** Abnormal CT or MRI Findings

|                   |
|-------------------|
| Pachygyria        |
| Lissencephaly     |
| Calcification     |
| Blake's Cyst      |
| Ventriculomegaly  |
| Dandy Walker      |
| Cerebral Atrophy  |
| Hydranencephaly   |
| Other Abnormality |
